# Supplementary material for: Accurate geometrical restraints for Watson–Crick base pairs
Source: PubMed Central journal article supplement (PMC6457083; doi:10.1107/s2052520619002002), 2019-03-27
Supplement: b-75-00235-sup1.pdf [file b-75-00235-sup1.pdf]

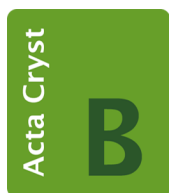

STRUCTURAL SCIENCE  
CRYSTAL ENGINEERING  
MATERIALS

**Volume 75 (2019)**

**Supporting information for article:**

**Accurate geometrical restraints for WC base pairs**

**Mirosław Gilski, Jianbo Zhao, Marcin Kowiel, Dariusz Brzezinski, Douglas H. Turner and Mariusz Jaskolski**

**Table S1** Rmsd comparisons of different QM methods.

|            | rmsd D3(BJ) vs M06 |            | rmsd D3(BJ) vs D3 |            |
|------------|--------------------|------------|-------------------|------------|
|            | Distances (Å)      | Angles (°) | Distances (Å)     | Angles (°) |
| A          | 0.0050             | 0.259      | 0.0010            | 0.100      |
| A in AT    | 0.0059             | 0.268      | 0.0011            | 0.111      |
| A in AU    | 0.0058             | 0.265      | 0.0010            | 0.120      |
| G          | 0.0056             | 0.310      | 0.0013            | 0.091      |
| G in GC    | 0.0063             | 0.288      | 0.0014            | 0.067      |
| iG         | 0.0050             | 0.254      | 0.0023            | 0.089      |
| iG in iGiC | 0.0056             | 0.307      | 0.0011            | 0.113      |
| U          | 0.0044             | 0.163      | 0.0014            | 0.064      |
| U in AU    | 0.0051             | 0.148      | 0.0014            | 0.066      |
| T          | 0.0043             | 0.269      | 0.0012            | 0.074      |
| T in AT    | 0.0058             | 0.254      | 0.0012            | 0.109      |
| C          | 0.0045             | 0.209      | 0.0009            | 0.069      |
| C in CG    | 0.0051             | 0.212      | 0.0010            | 0.048      |
| iC         | 0.0040             | 0.209      | 0.0014            | 0.124      |
| iC in iGiC | 0.0046             | 0.155      | 0.0015            | 0.096      |

**Table S2** CSD refcodes of structures used to determine the geometry of the indicated nucleobases.

| <b>adenine</b> |          |
|----------------|----------|
| ACADOS         | ACUHUB   |
| ADENOS01       | ADENOS10 |
| ADIJEC         | ADOSBU01 |
| ADPCPY         | ADPROP   |
| ADYPUR10       |          |
| AJAFIA         | AMDOAD   |
| AMOADA         | AMOADB   |
| AMOADC         | ARADEN10 |
| ASOZIS         | ATEXOM   |
| AWAZAA         | AWAZEE   |
| BAPTOE         | BEDLIF   |
| BETWUS         | BIFYOE   |
| BOYDUO         | BUVPOX   |
| CAFKEA         | CAQLUC   |
| CAQMAJ         | CATGIP   |
| CATGOV         | CATGUB   |
| CELLIP         | CEQYON   |
| CEQZEE         | CEZBIS   |
| CEZMEZ         | CHXADI10 |
| CIDGUR         | COCZID   |
| CORDCP01       | CUBRUM   |
| DAHJUJ         | DATZOP   |
| DATZUV         | DHOADS01 |
| DHOADS10       | DOHGEM   |
| DORJOJ         |          |
| DOXADM02       | DPHEAD20 |
| DUXSAR         | EADPBA   |
| EGONET         | EWOCUP   |
| FABFUJ01       | FADSAF   |
| FEXSIL         |          |
| FEYBER         | FIBGEC   |
| FIKCAE         | FIKCEI   |
| FIKHAI         | FIKHAI01 |
| FISKOI         | FOYLUA   |
| FUBZEJ         | FUWTOH   |
| GAHHIG         | GAHHIG01 |
| GIQRIH         | GODPIY   |
| HACNUV         | HACPAD   |
| HAKKEG         | HAXWV    |
| HEMYIH         | HIFKEM   |
| HIQNI          | HOZBED   |
| HOZTAT         | HUGXUD   |
| HUVGIP         | HUVGOV   |
| HUYCEK         | IKOJEX   |
| IKOJOH         | IPADOS02 |
| ITOLOU02       | IVAMUO   |
| IZECAS         | JACTUD   |
| JACVAL         | JADMUX   |
| JAHLAF         | JESVOT   |
| KECYUN         | KECZAU   |
| KEMYEG         | KEMYEG01 |
| KEPLIA         | KEPLOG   |
| KEWGAV         | KUBGUJ   |
| KURGEK         | KUYWEH   |
| LAPXEH         | LOQROY   |
| MARBEM01       | MEADEN01 |
| MEADEN02       | MEADEN04 |
| MEADEN05       | MEDLEN   |
| MICFIP         | MICFOV   |
| MICGAI         |          |
| MOPJEG         | MTHMAD12 |
| MTHMAD13       | NAAMPH10 |
| NAGLAI         | NAKPUN   |
| NAKQAU         | NAKZUU   |
| OJEJES         |          |
| OJUTET         | OPADNA   |
| OPADNA01       | OPADNB   |
| ORELAA         | ORELEE   |
| OVAZAN         | PAFBUV   |
| PAKWON         | PEXTAN   |
| PIVSUI         | QACLUE   |
| QACMAL         | QAWTUE   |
| QETWIV         | QICLAP   |
| QIWGAE         | RITNAK   |
| RUBVEQ         | RUHRES   |
| SAYQUE         | SICHES   |
| SITMIR         | TELBOD   |
| THOPAD10       | TIKQIP   |
| TIKQUB         | TOYTAE   |
| TOYTIM         | TUGJAG   |
| TUHCEF         | TUNMAQ   |
| UNALEB         | URALOQ   |
| VAVTOB         | VAVZUO   |
| VAZRUL         | VOMFOS   |
| VORQOK         | WAJZEM   |
| WEZZUY         | WIBXEK   |
| WIPCIH         | WIPWEX   |
| WOBXAM         | WULXOQ   |
| WUSGOH         | WUWCUO   |
| XAKTIM         | XASFED   |
| XECLEX         | XIJPUD   |
| XOBRIQ         | XUDQAP   |
| XUXQIS         | YABGAJ   |
| ZEVTID         | EWOCUP01 |
| ACEQEH         | ADENOS13 |
| REFXAE         | FEXNEE   |
| NAAMPH11       | LEYBID   |
| <b>guanine</b> |          |
| ANITUN         | BUDWAY10 |
| CAQKOV         | CAQLIQ   |
| CEHTAK10       | CELLOV   |
| EMUHAX         | EMUHEB   |
| FOZNIT         | GEBRIO   |
| GIPBIQ         | GUANSH10 |
| GUOPNA10       | GUOPNA11 |
| HOPBOD         | JAFHIH   |
| KUTDOU         | MECWIC   |
| MECWOI         |          |
| NEPLID         | OXIJEM   |
| QUQWOO         | RECZAA   |
| RIGDES         | SCGMPT10 |
| SCGMPT11       | SDGUNP   |
| TAMXEK         | TARLAC   |
| VIDYOY         | VUWREK   |
| WULXUW         | XIZGOC   |
| YACGUE         | YACGUE01 |
| YIHJOP         | YIHJUV   |
| YIHKAC         | YURTIP   |
| ZEVPEX         | ZEVPIB   |
| ZEVPOH         | ZUZXAT   |
| UGIVAI01       | BEWKUM   |
| BEWKUM01       | KETNEF   |
| KETNEF01       |          |
| KETNEF02       | WIFDUN   |
| <b>uracil</b>  |          |
| AFOBAZ         | AURCPB   |
| AXEFOA         | BENXEX   |
| BEPFEI         | BEURID10 |
| BINRIB         | BIYRIK   |
| BOFWIC         | BOPVOS   |
| BUDVUR10       | BUFYIK   |
| CAWCAE         | CDURID   |
| CEDBIW         | CEKLIZ   |
| CIHHIK01       | CIRYUX   |
| COMBOV         | CUDYOR   |
| CUKQAB         | CUZWIE   |
| DAURID01       | DAYPID   |
| EHOQOJ         | EHOREA   |
| EHUFEU         | EHUFIY   |
| EJAFOM         | ERAJUC   |
| EVIPOO         | FECFAU   |
| FICJEI         | FIPKAQ   |
| FIPKEU         | FISKIC   |
| FIXMIK         | FIYTAJ   |
| FIYTIR         | FUNTEN   |
| GATHOY         | GIDZIC10 |
| GIYWOB         | GIYXIW   |
| GULVEO         | HALRES   |
| HEXWAJ         | HIKNIY   |
| HURLIQ         | IGORIF   |
| IJIWIH         | JEVPAC   |
| JEYKOO         | JEYKUU   |
| JIKBUA         | JIQREG   |
| JIQRIK         | JUCNOK   |
| JUCPAY         | KATYOT   |
| KIGMEU         | KIGMOE   |
| KIHICIO        | KIXFON   |
| KOFGUH         | KOFGUH10 |
| KUKSEQ         | LAVXOW   |
| LOWJIQ         | LUWDOY   |
| LYFURA         | MAQVAB   |
| MAWPUW         | METURA01 |
| METURA02       | METURA03 |
| METURA04       | METURA05 |
| MOPJIK         | MUTWED   |
| MXEURD         | NIFNOF   |
| OJOVOZ         | OXIGAE   |
| PABKOS         | PARZIU   |
| PEHZAF         | PEQDEU   |
| PETQIP         | PIRZAS   |
| PUDVAN         | QAHZAB   |
| QAJJES         | QAKBOV   |
| QAVYES         | QETWER   |
| QEXQUG         | QIXYOL   |
| QUBVUE         |          |

RAQDUI ROVQEA RUHDED SAHDIP SAPSIL SIJGID SURIDP SUROMM THFURC10 THPYUR  
 TIMKEH TULCIO TUWMOP ULENOQ URARAF01 URARAF10 URIDMP10 VAHDEQ VAHDOA  
 VANJEZ VAVZIC VEVHUZ VEVHUZ01 VOMFIM VOMGAF VOYVAG VOYVEK VUKGOX WAXLEM  
 WEVJOX WIBWIN WIRZIG WIVYUV WIVZAC WOBKOO WORVUW XAKNON XECLIB YEDHEU  
 YERDAA YERDOO YERDUU YIBDOC YISCIO YOFMUC YOGYOI YOTWV VOTXIQ ZAMTEM  
 ZAPXIX ZZZAPA10 CEWJAS HENHOA XEVBIM LIGXIL

---

**thymine**


---

ABEPIH ABEPIH01 ABIRIP ABUKOX ACOJOT AKUNAW AKUZEM ALALAB AMERUF AQEJUC  
 ASABAX ASABEB ASACIG ASACOM AWAZII BICRUA BICRUA01 BINQUM BINRAT BINREX  
 BISLAQ BOLVED BOPQOO CACPAY CEVWOR CEWXAE CEZFOC CIMHIR CIXZOZ CLQUNB10  
 COJZOS COJZUY COKBAH COKBEL COKBIP COWLIL CUQBOG DAYVOO DEJSAM DELCUU  
 DEZNON DISLUN DOXZIZ DUKSOR DUNSAH DUXXEZ ECIJOR ECIKAE EHABAS EHABEW  
 EHABIA EHOROK EXUPES FEFMEK FIRPOL FIXGAU FIXGAU01 FIXGAU02 FIXGAU03  
 FIXGAU04 FIXGAU05 FIZMAD GAKSEQ01 GEBTEM GEHVOF GEXXI Q GEXXI01 GINKOE  
 GIYWIV GIYXES GUYVAX HANPOB HAXWOV HIKCAH HIXKIK HUVGEL IFIGAG IHOHEU  
 IWUKOB IYATIL IZUXAC JACVIT JEYLUV JUBQUU KASVEF KATYIN KATYIN01 KAZBIZ  
 KAZBOF KECYUN KEDPOB KEXFUO KEXKIH KEZRUC KICJEL KIFDAF KINHEU KINHIY  
 KITSOV KOGBIR KONNOQ KOTCOL KUNNEM KUPVOG KUTDUA KUTHOW KUZXEI LEDRAN  
 LEDRER LEPVOR LESJUP LETJEZ LOWHEK LOWHIO LUWDAK LUWDIS LUWDOY MABWAP  
 MAWBIV METHYM01 METHYM03 METHYM04 MEURID02 MEURID03 MIBYUS MISQOU MOGMAW  
 MTHMAD12 MTHMAD13 MUTWUT NAGLEM NIJKEX NIJKIB NIXHEH NOFSIM NOMKUV NOMLAC  
 OBUCIA OBUCOG OGETAV OKETUT OLATAW ONIYUH OXIGEI PAFSUN PAFTAU PAGLEQ  
 PAGLOA PALWUZ PEYQUG PEYRAN PIZNIV POPCEE PUKQOB PUMCOR QAJYEI QITKOU  
 QOKJUV QOVFAK QUMNUH RALWOR RAZKOT REGHER REZTEV REZTIZ REZTOF RIGTEG  
 RIGTIK RULHEM SARKUU SENXUG SEPKOO SODDEU SOSBEI SOSBIL SULRIA TEFFOB  
 TEKTOZ TEYDAC05 TEYDAC06 TEYDAC07 THYDIN01 THYDIN02 THYDIN03 THYDIN05  
 THYMDN01 TICSAB TIKQOV TIKRAI TOLXUO TPATAA TRFUTM TUSZIR TYMCXA UPAQOT  
 UTAXEU UTEWEX UTEWIB VABVID VAHDIU VAHNEZ VASZOF VAVZOI VEVBUT VEVBUT01  
 VEVROE VIGGEX VIGGEX01 VIKFEA VIYSUS VUWCUM WECGES WELMEF WEYRUP WIPCED  
 WIPCON WIXHUG WIXJAO WOMFUA WOMGAH WOMGIP WOMHEM WUQJIB WUQZAJ XACMUM  
 XEBJAQ XEGMOL XEWQUL XEZCAH XOSGOC XOSGUI XOSHAP XOSHET XOSLUN YACTEC  
 YACTEC01 YACTEC02 YAFQEC YAFQEC01 YAPGON YASJIM YAVKUB YEGSEI YEMZUN  
 YEWCEJ YOGYEV YOGYIC YUYZIA ZABSAW ZASQUF ZASRAM ZEXWII ZUGRIC ZUNQEG  
 ZUVTIV CELDAB JELBEK JELBIO REJHOG REJJAU CEWCAL HENHUG

---

**cytosine**


---

ACYTID AMAJON AMAKAA BAGXI01 BARZOJ BARZOJ01 BISMAR BIVVIL BOFWOI BOMTAY  
 BOSGOF BOTSIM BOTSIM10 BOXGIE BUDWAY10 CIMJEN CITMOH01 COQNAX CUPYUH  
 CYTCYP20 CYTIDI01 CYTIDI02 CYTIDI10 CYTIDI11 CYTIDI12 DATZIJ DECYUF  
 DXCYTD DXCYTD01 FIKHOW FIYTEN FOCFOT FOVXET GAHHOM GAHHOM01 GIGMOY GODJEQ  
 GOKFES GOUGER10 GUTPUI HIMXIL HIXKOQ HUVCAG ITOCUQ JIKHOA JUHLAZ KAYWEN

---

---

KECCUT KECRUI KEWGEZ KIDLUF KIDMAM KIGMIY KOSNOV LALKOZ LAVZEO MARAFC  
MAZFUO MAZGAV MCYTIM10 MECTSI METCYT01 NAGLIQ NUJDAX NUWKEX PEHYEI PEHYOS  
POGGAT PUCPAF QECCIK QOMQEO QUWXOW RIQNAH RIVCAA RIVCEE RUCPUB RUKGUZ  
RUKHAG01 SEGMAS SETWIY SIKBOE SIVZUS SOMVUL UDOVIT UPEPUB UPEQEM UYEZAB  
VISWAX VUVNIL WAXLUC WIPWIB WOMHEM XANBAQ XANBEU XAXPIW XEGXUC XOFZAV  
XOMKOB XOMKUH XUHZEF XUHZIJ XYFCYT10 YUKLIZ ZEKGII TEVYIF TEVYOL

---

**Table S3** Molecular geometry (Å, °) of methylated A/G and adenosine/guanosine.

|          | methyl-A | ribo-A | methyl-G | ribo-G |
|----------|----------|--------|----------|--------|
| N1-C2    | 1.338    | 1.341  | 1.366    | 1.369  |
| C2-N3    | 1.331    | 1.334  | 1.308    | 1.308  |
| N3-C4    | 1.334    | 1.336  | 1.352    | 1.359  |
| C4-C5    | 1.394    | 1.396  | 1.393    | 1.393  |
| C5-C6    | 1.405    | 1.408  | 1.432    | 1.438  |
| C6-N1    | 1.340    | 1.343  | 1.435    | 1.443  |
| C5-N7    | 1.380    | 1.382  | 1.379    | 1.378  |
| N7-C8    | 1.309    | 1.310  | 1.304    | 1.306  |
| C8-N9    | 1.377    | 1.386  | 1.384    | 1.390  |
| N9-C4    | 1.375    | 1.380  | 1.367    | 1.373  |
| C6-N6    | 1.349    | 1.356  | -        | -      |
| C6-O6    | -        | -      | 1.213    | 1.211  |
| C2-N2    | -        | -      | 1.360    | 1.376  |
| C6-N1-C2 | 118.83   | 118.47 | 126.56   | 126.57 |
| N1-C2-N3 | 128.36   | 128.61 | 123.25   | 123.36 |
| C2-N3-C4 | 111.59   | 111.47 | 112.94   | 112.90 |
| N3-C4-C5 | 126.56   | 126.72 | 128.96   | 128.98 |
| C4-C5-C6 | 116.11   | 115.91 | 118.70   | 118.83 |
| C5-C6-N1 | 118.55   | 118.82 | 109.60   | 109.35 |
| N3-C4-N9 | 128.18   | 128.28 | 125.42   | 125.45 |
| C6-C5-N7 | 132.99   | 132.86 | 130.87   | 130.45 |
| C5-C4-N9 | 105.26   | 105.01 | 105.63   | 105.56 |
| C4-N9-C8 | 106.00   | 106.09 | 106.11   | 105.88 |
| N9-C8-N7 | 113.70   | 113.41 | 113.04   | 113.01 |
| C8-N7-C5 | 104.14   | 104.26 | 104.79   | 104.81 |
| N7-C5-C4 | 110.91   | 111.23 | 110.43   | 110.72 |
| N6-C6-N1 | 119.09   | 118.94 | -        | -      |
| N6-C6-C5 | 122.36   | 122.24 | -        | -      |
| O6-C6-N1 | -        | -      | 118.92   | 119.12 |
| O6-C6-C5 | -        | -      | 131.48   | 131.52 |
| N2-C2-N1 | -        | -      | 117.39   | 117.06 |
| N2-C2-N3 | -        | -      | 119.37   | 119.53 |

—●— All structures    —●— Only non-disordered structures    —●— No outlier removal    -▲- Outlier removal

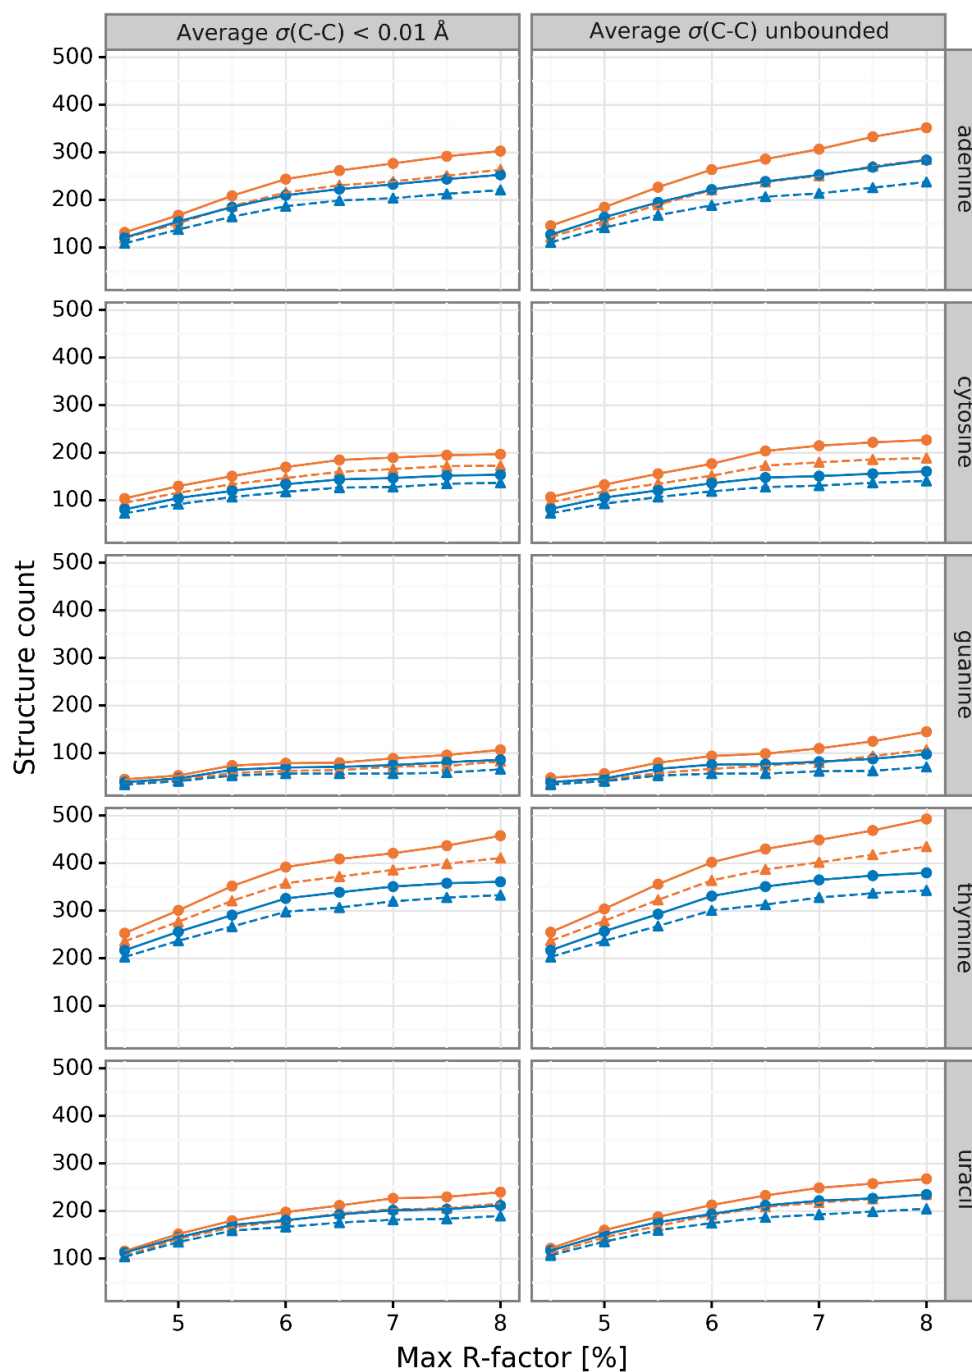

**Figure S1** Number of nucleobase substructures in the CSD retrieved using various sampling criteria: maximum  $R$ -factor threshold ( $x$ -axis), maximum  $\sigma(\text{C-C})$  (columns), all/non-disordered structures (blue/orange), all structures/outlier removal (solid/dash line).

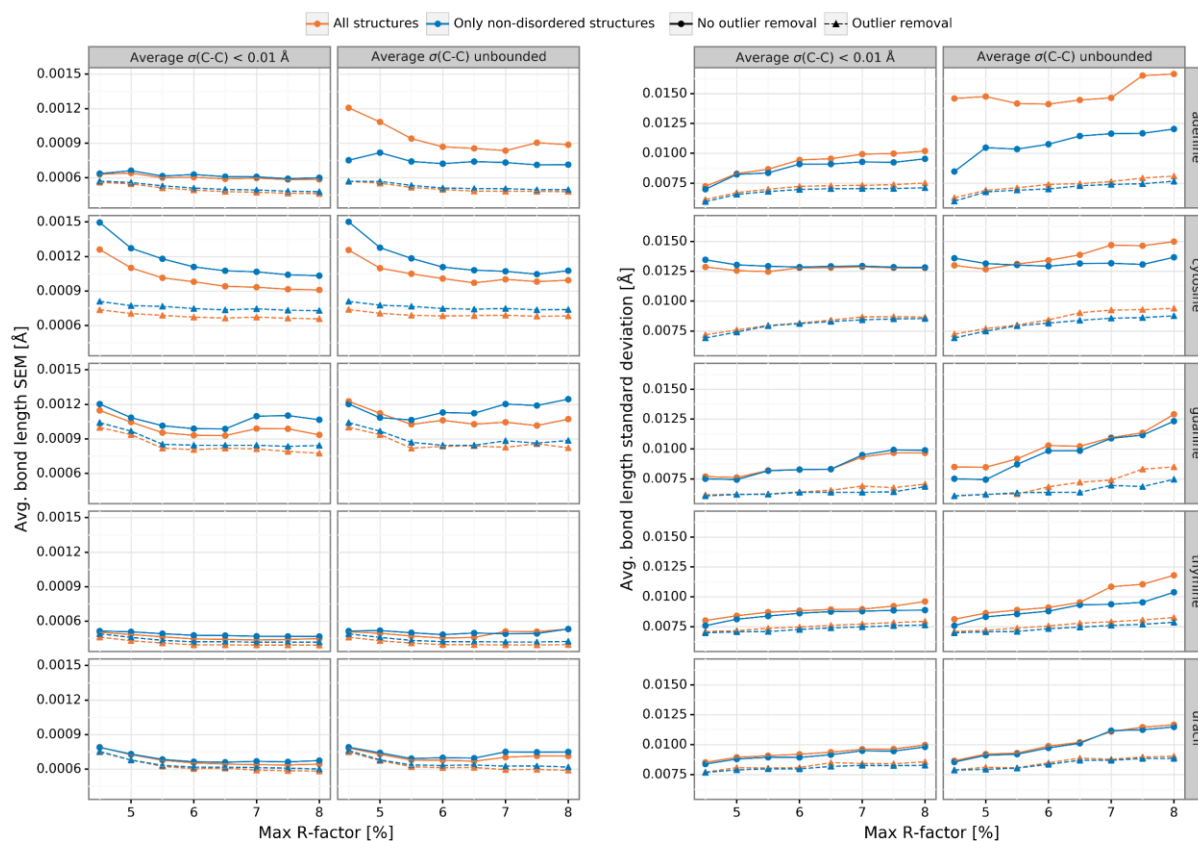

**Figure S2** Analysis of average bond length ( $\text{\AA}$ ) standard error of the mean (SEM) (left) and sample standard deviation (right) for varying CSD sampling criteria: maximum  $R$ -factor ( $x$ -axis), maximum  $\sigma(\text{C-C})$  (columns), all/non-disordered structures (blue/orange), all structures/outlier removal (solid/dash line).



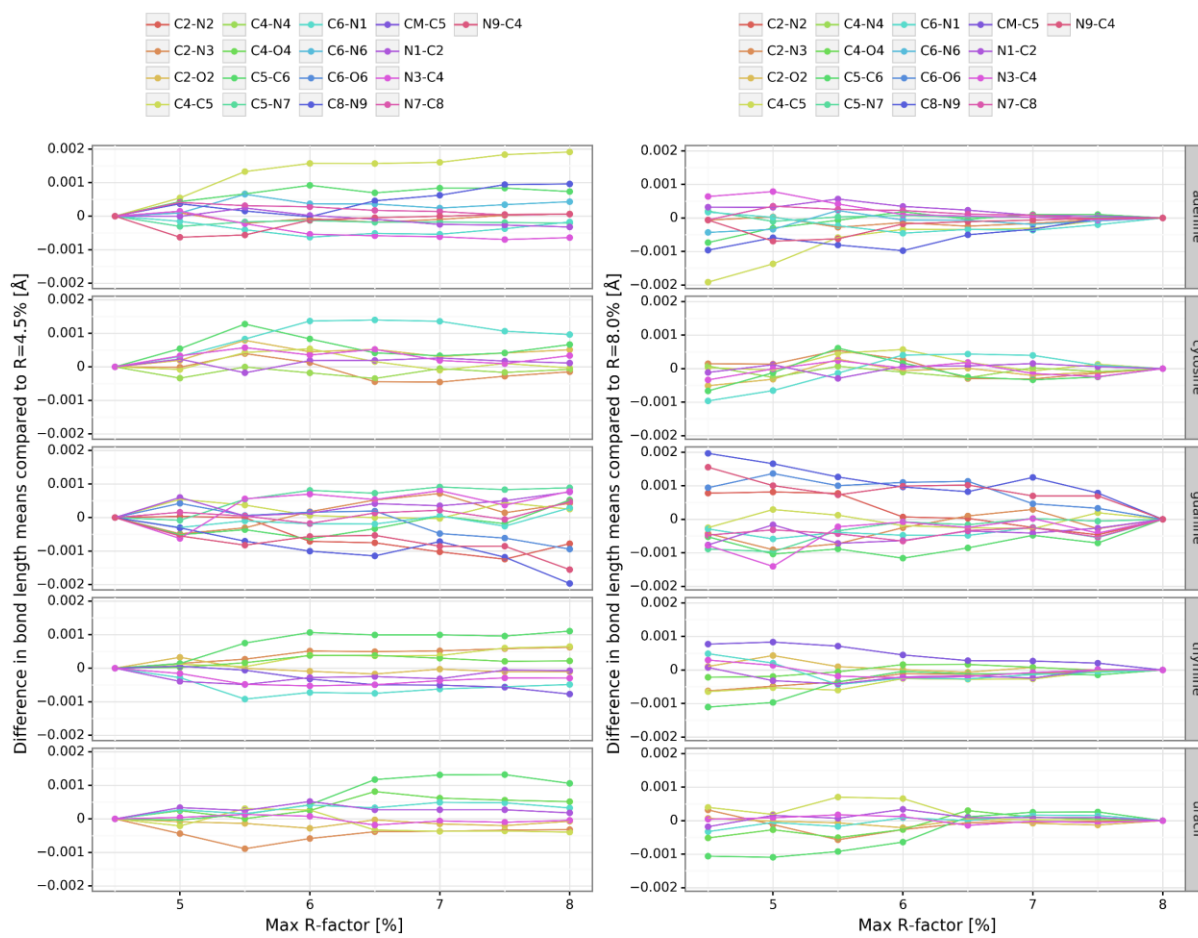

**Figure S3** Deviations of the mean values of bond length (Å, left) and bond angle (°, right) calculated for CSD samples with different  $R$  thresholds, with reference to the set with  $R \leq 4.5\%$  (lowest  $R$ -factor).

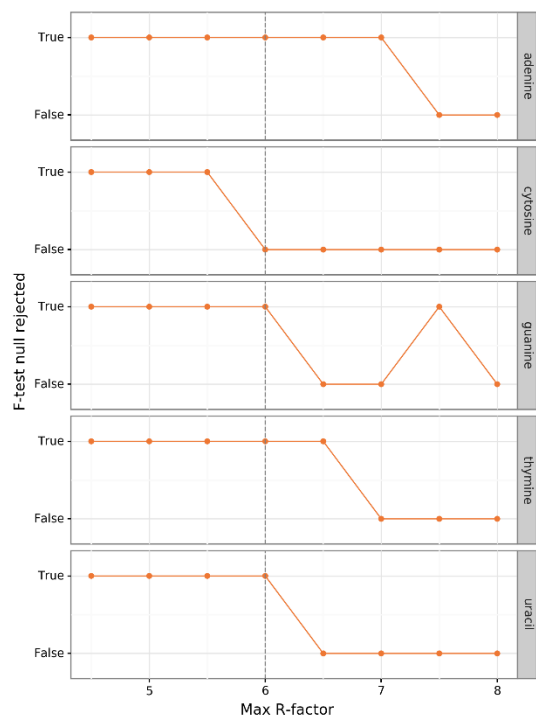

**Figure S4** Results of *F*-test comparing the variance of CSD structures having *R*-factor  $\leq 8\%$  with samples having lower max *R*-factor, at significance level 0.05.

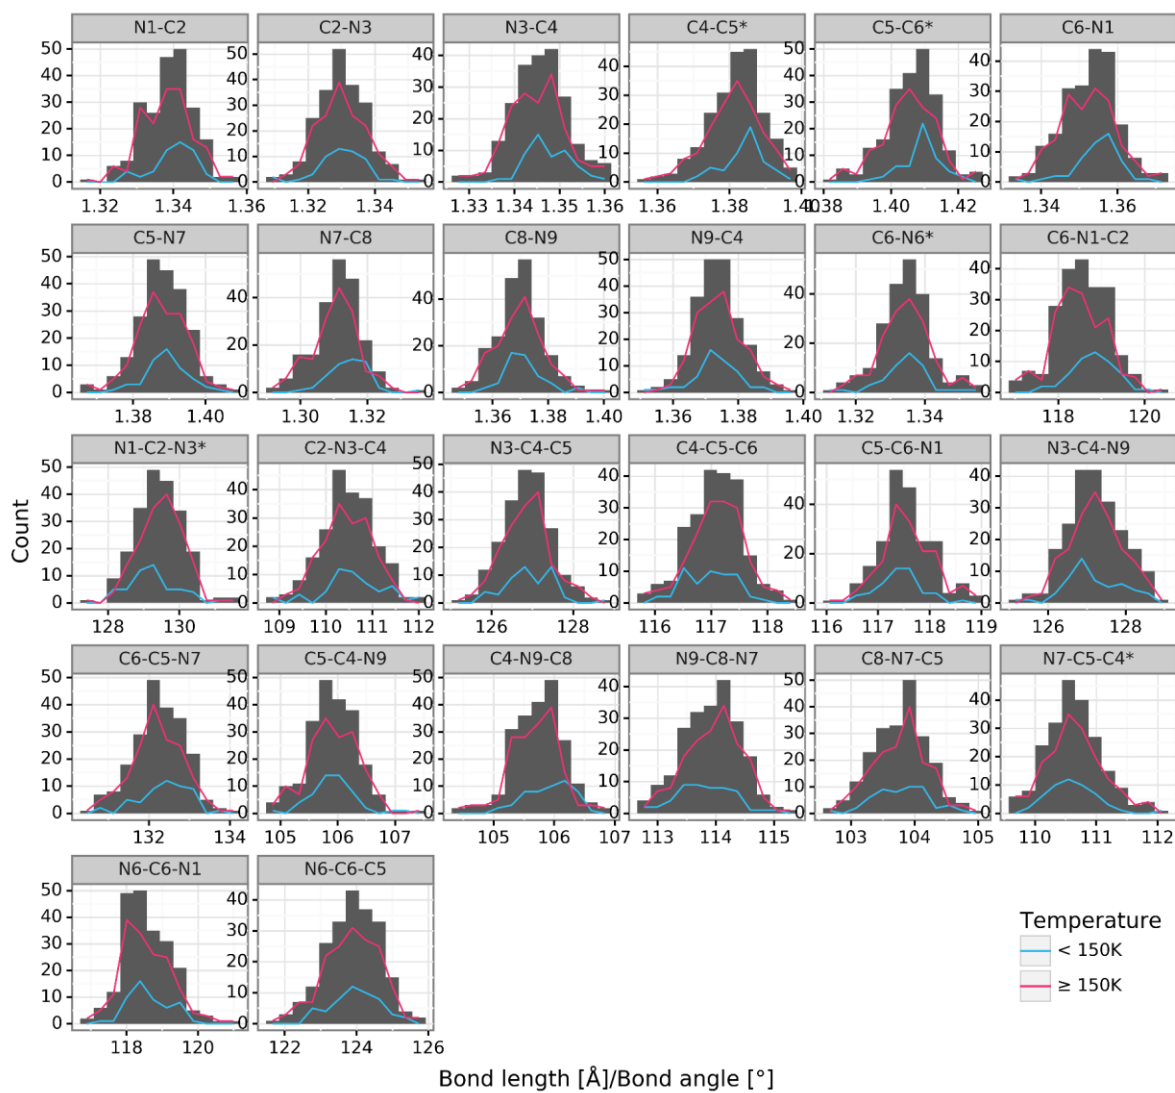

**Figure S5** Frequency distributions of bond lengths (Å) and angles (°) for adenine. Bond lengths and angles with non-normal distribution according to the Shapiro-Wilk test at significance level 0.05 are marked with an asterisk.

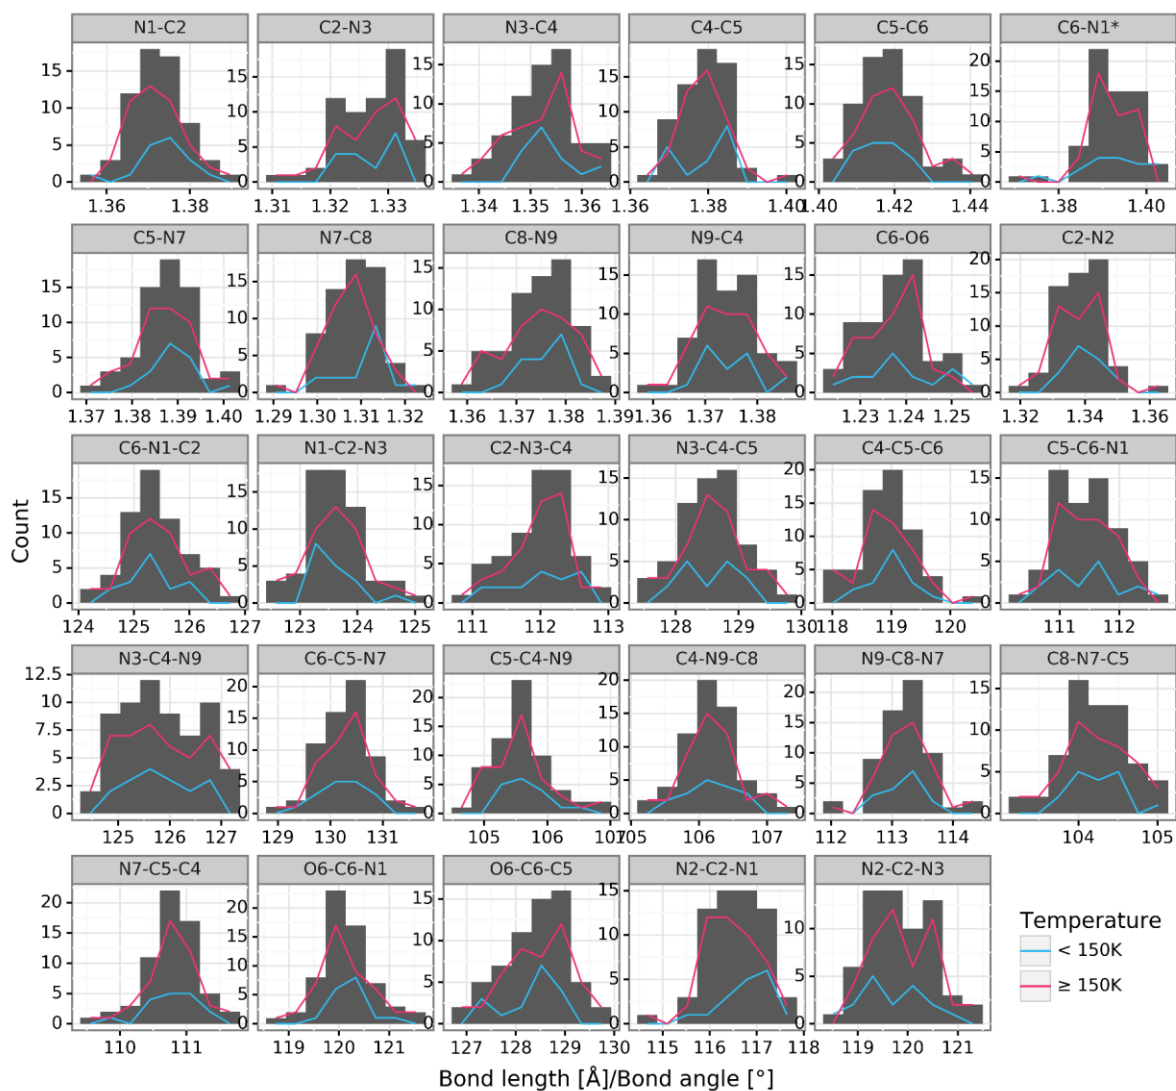

**Figure S6** Frequency distributions of bond lengths ( $\text{\AA}$ ) and angles ( $^\circ$ ) for guanine. Bond lengths and angles with non-normal distribution according to the Shapiro-Wilk test at significance level 0.05 are marked with an asterisk.

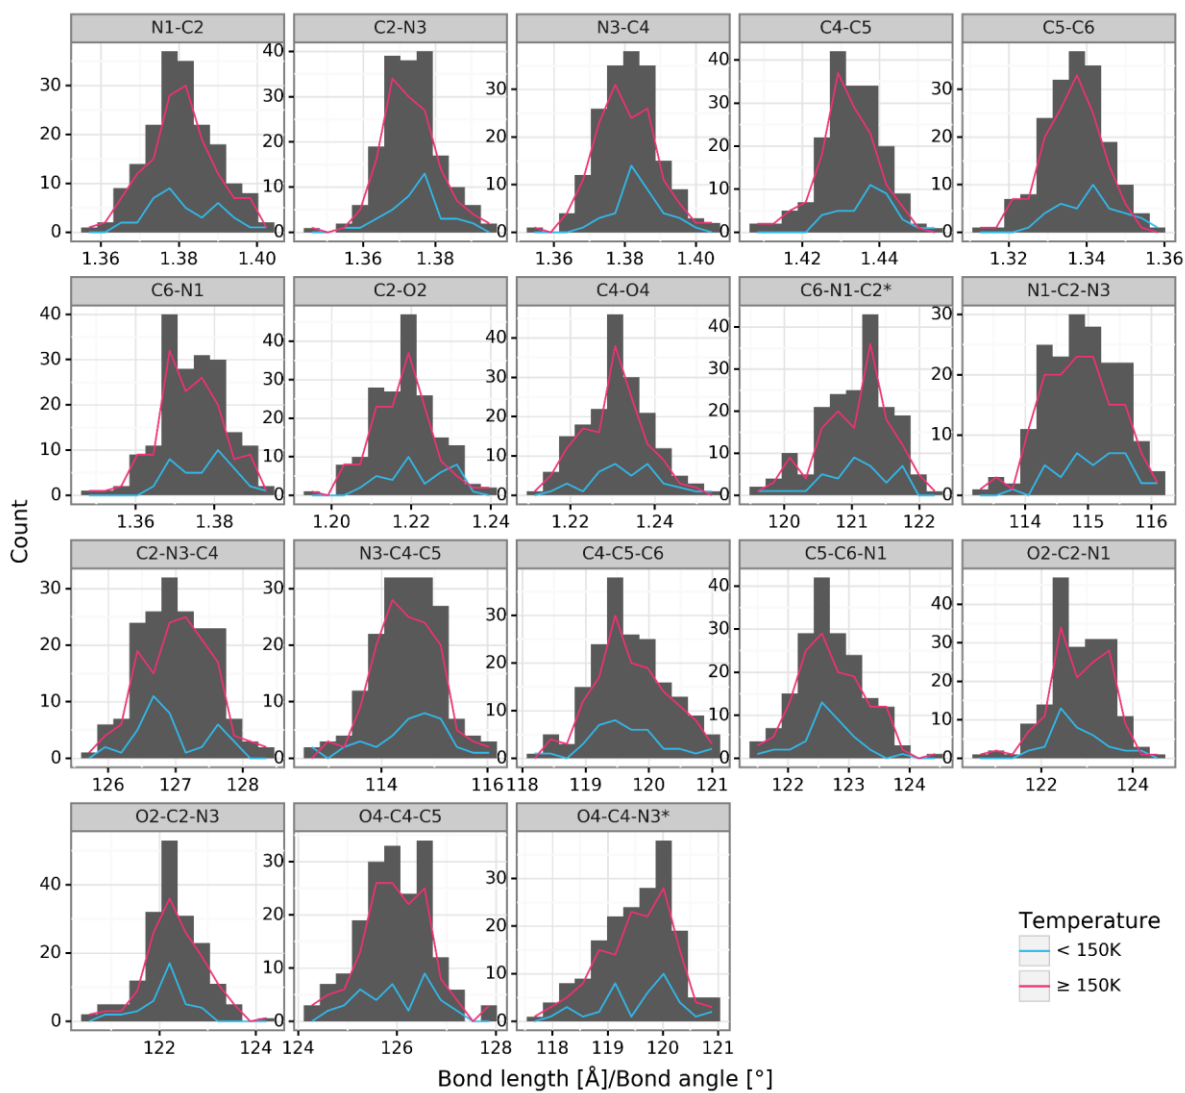

**Figure S7** Frequency distributions of bond lengths (Å) and angles (°) for uracil. Bond lengths and angles with non-normal distribution according to the Shapiro-Wilk test at significance level 0.05 are marked with an asterisk.

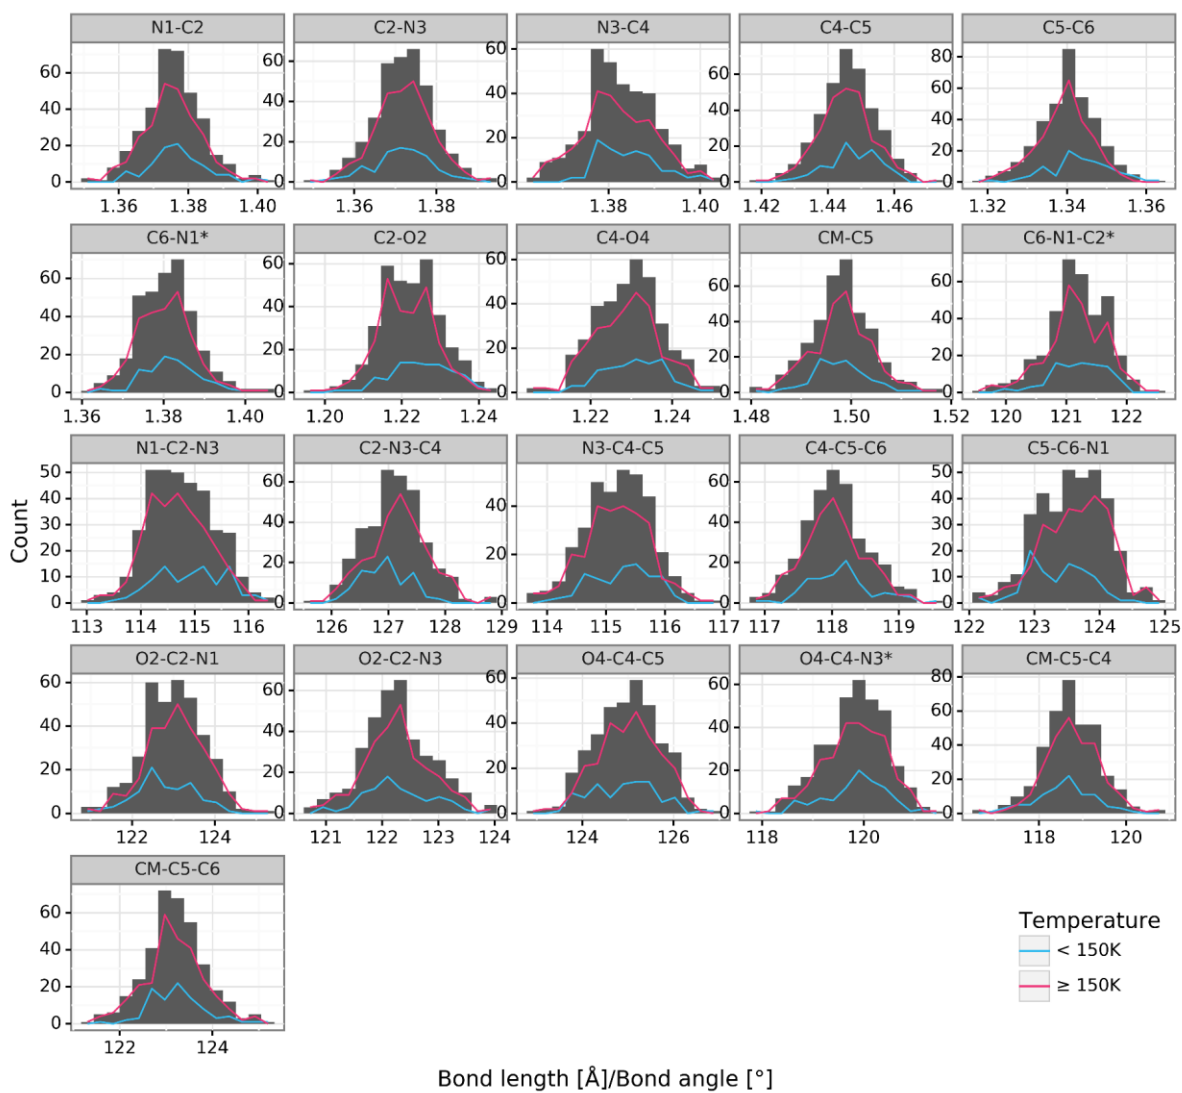

**Figure S8** Frequency distributions of bond lengths (Å) and angles (°) for thymine. Bond lengths and angles with non-normal distribution according to the Shapiro-Wilk test at significance level 0.05 are marked with an asterisk.

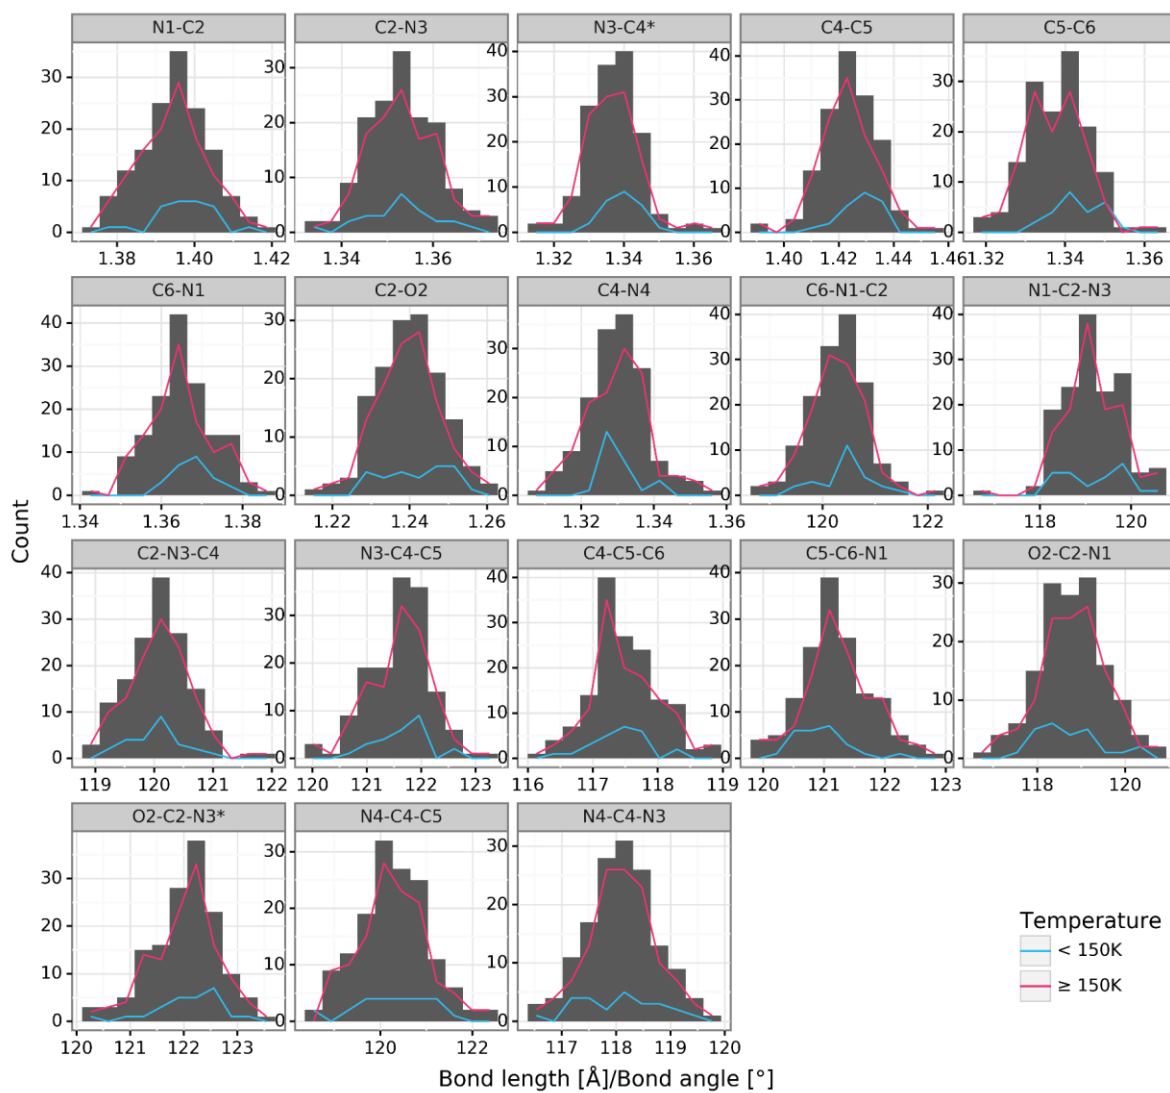

**Figure S9** Frequency distributions of bond lengths (Å) and angles (°) for cytosine. Bond lengths and angles with non-normal distribution according to the Shapiro-Wilk test at significance level 0.05 are marked with an asterisk.

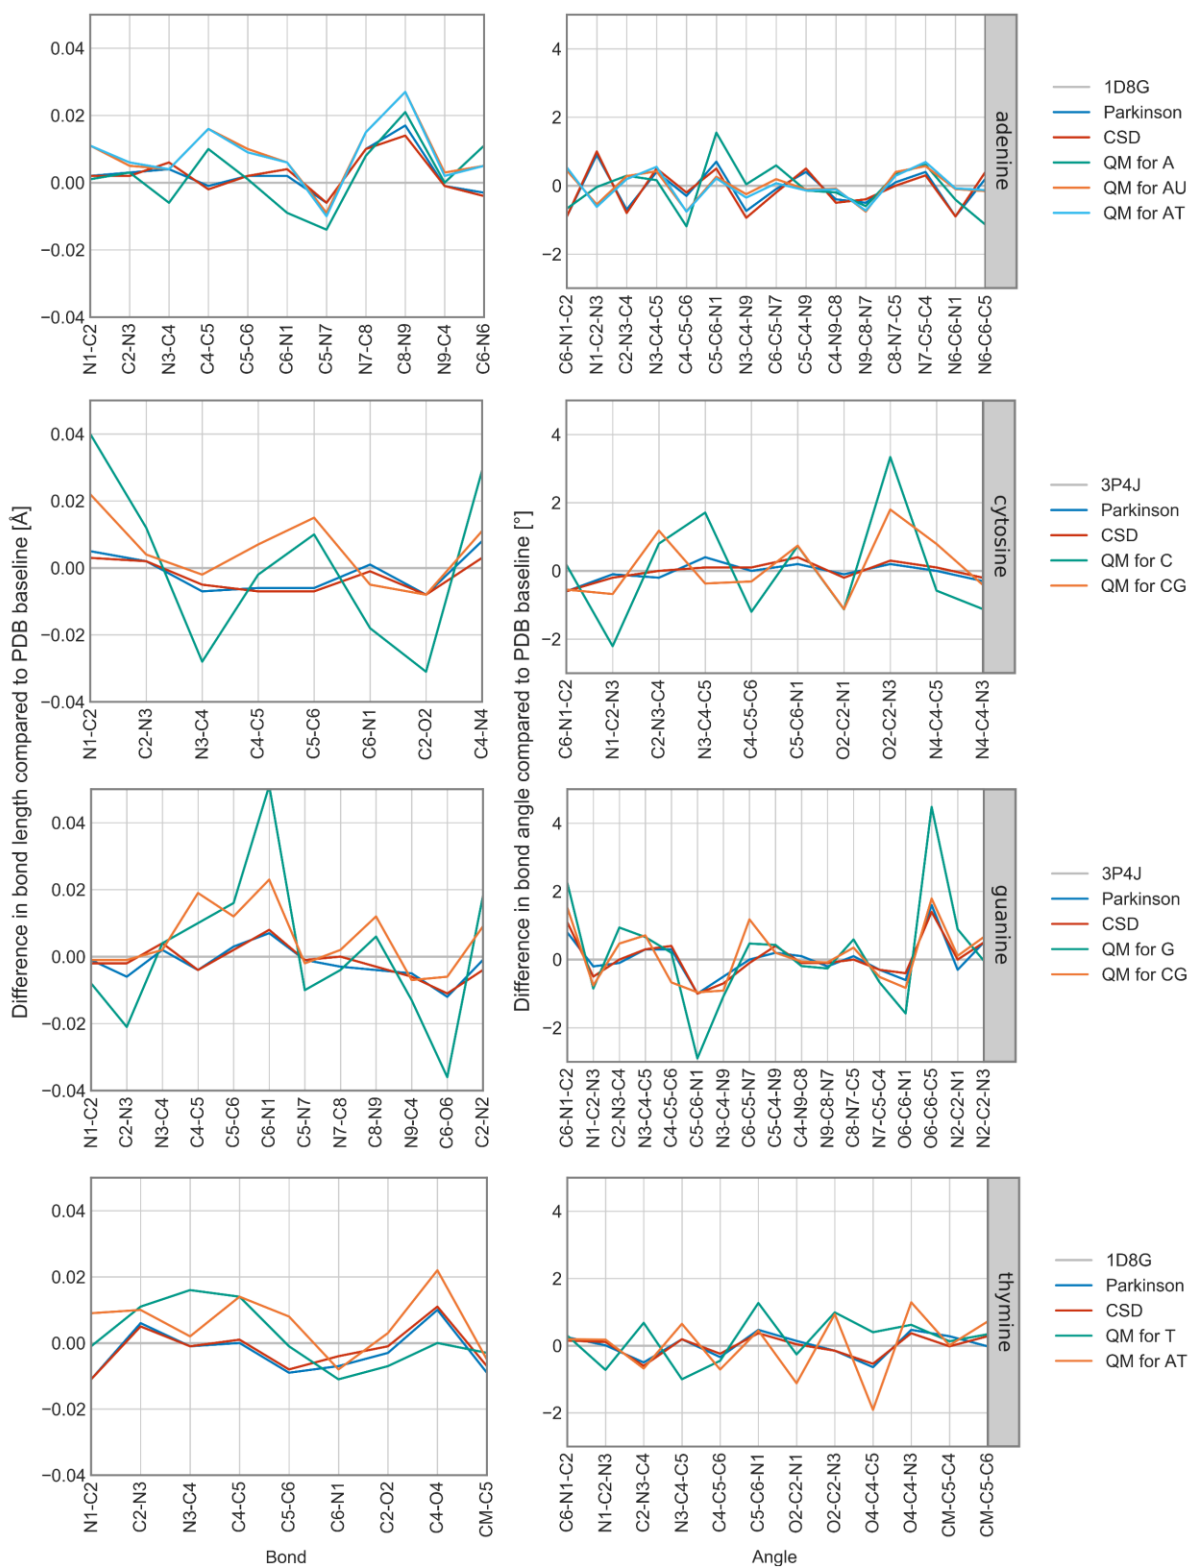

**Figure S10** Parallel coordinates plot comparing Parkinson, CSD, and QM restraint targets against PDB baselines (3p4j/1d8g). Each set of restraint targets (Parkinson, CSD, QM) is represented as a set of connected line segments. Each vertical line represents one bond or angle. The y axis shows the differences in bond lengths (Å) and angles (°).
